# Supplementary material for: Time-use differences in 24-hour movement behaviours by sociodemographic and health- related factors among Japanese adults
Source: Research Square preprint supplement (doi:10.21203/rs.3.rs-7453049/v1), 2025-09-11
Supplement: Supplementary file 1 [file cb7df0c95bf3325e8333f88f.docx]

**Supplemental Materials**

**Title:** Time-use differences in 24-hour movement behaviours by sociodemographic and health-related factors among Japanese adults

**Author (s):** Yu-Tai Liu, Ai Shibata, Kaori Ishii, Sayaka Kurosawa, Koichiro Oka

**Figure legends**

Supplemental Figure 1. The percentage differences with bootstrap 95 confidence intervals in 24-hour movement behaviour composition between age groups and the sample mean.

Supplemental Figure 2. The percentage differences with bootstrap 95 confidence intervals in 24-hour movement behaviour composition between annual household income and the sample mean.

Supplemental Figure 3. The percentage differences with bootstrap 95 confidence intervals in 24-hour movement behaviour composition between smoking status and the sample mean.

Supplemental Figure 4. The percentage differences with bootstrap 95 confidence intervals in 24-hour movement behaviour composition between alcohol consumption and the sample mean.


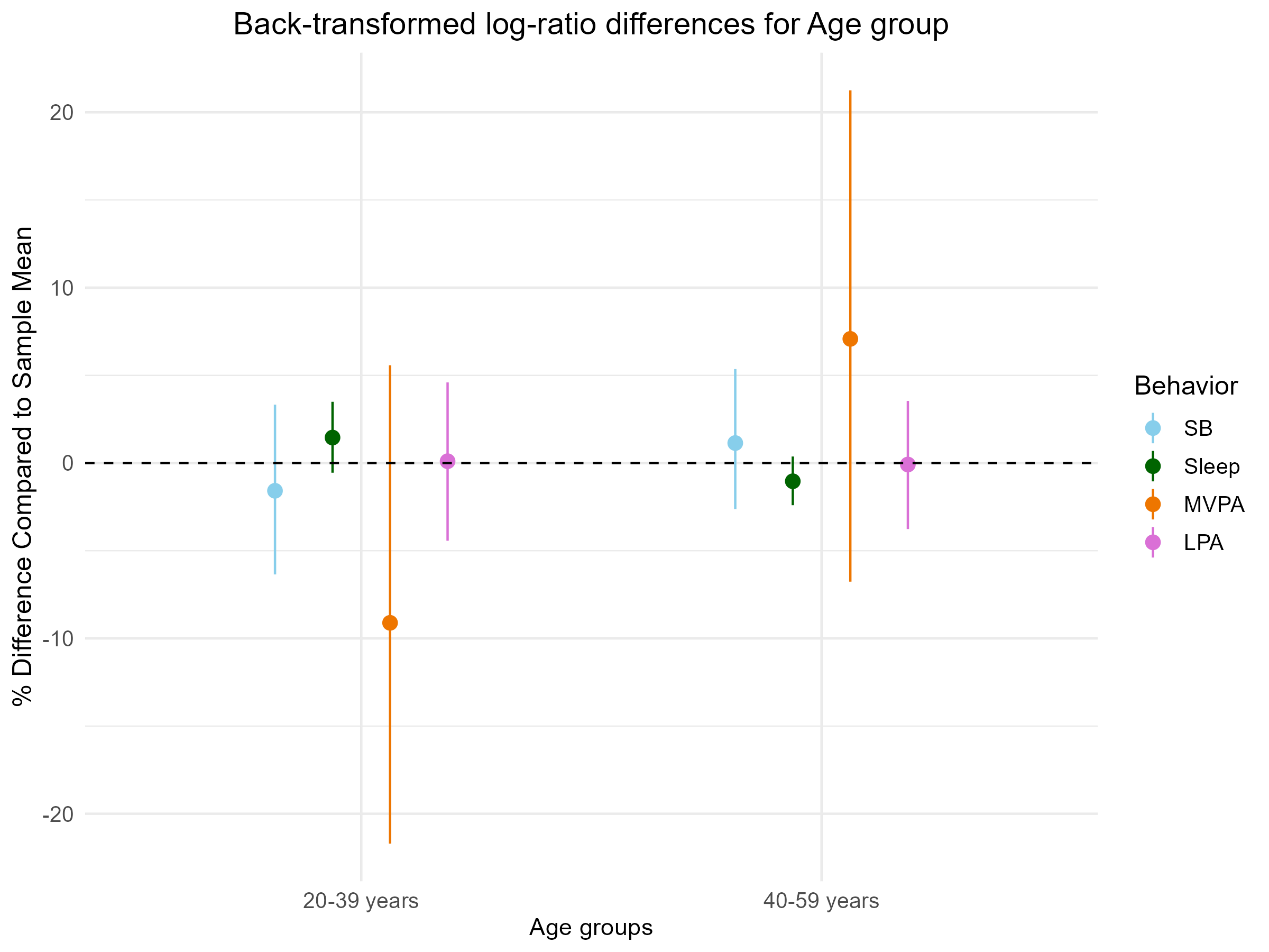


Supplemental Figure 1. The percentage differences with bootstrap 95 confidence intervals in 24-hour movement behaviour composition between age groups and the sample mean. SB: sedentary behaviours, MVPA: moderate-vigorous physical activity, LPA: light physical activity.


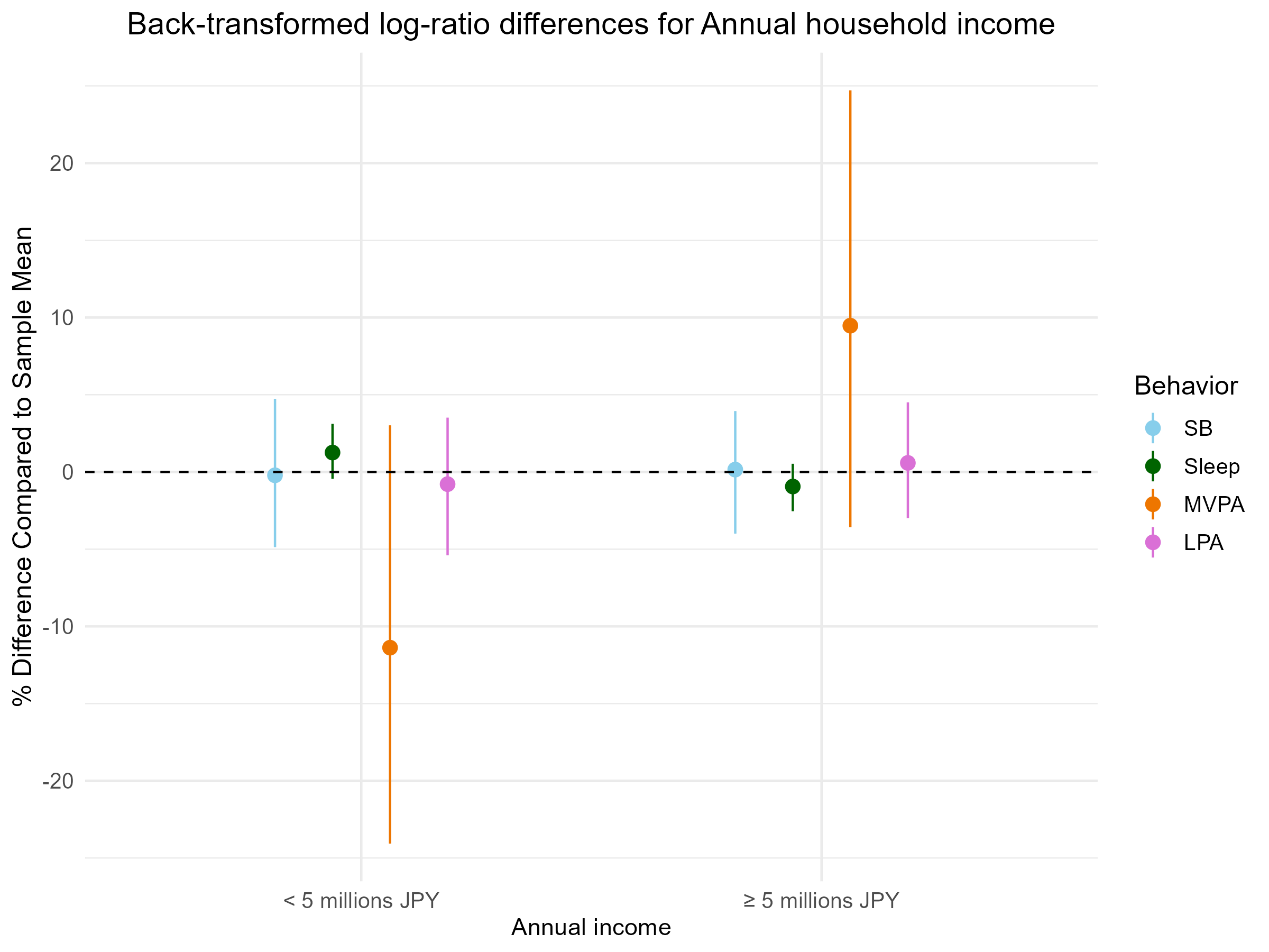


Supplemental Figure 2. The percentage differences with bootstrap 95 confidence intervals in 24-hour movement behaviour composition between annual household income and the sample mean. SB: sedentary behaviours, MVPA: moderate-vigorous physical activity, LPA: light physical activity.


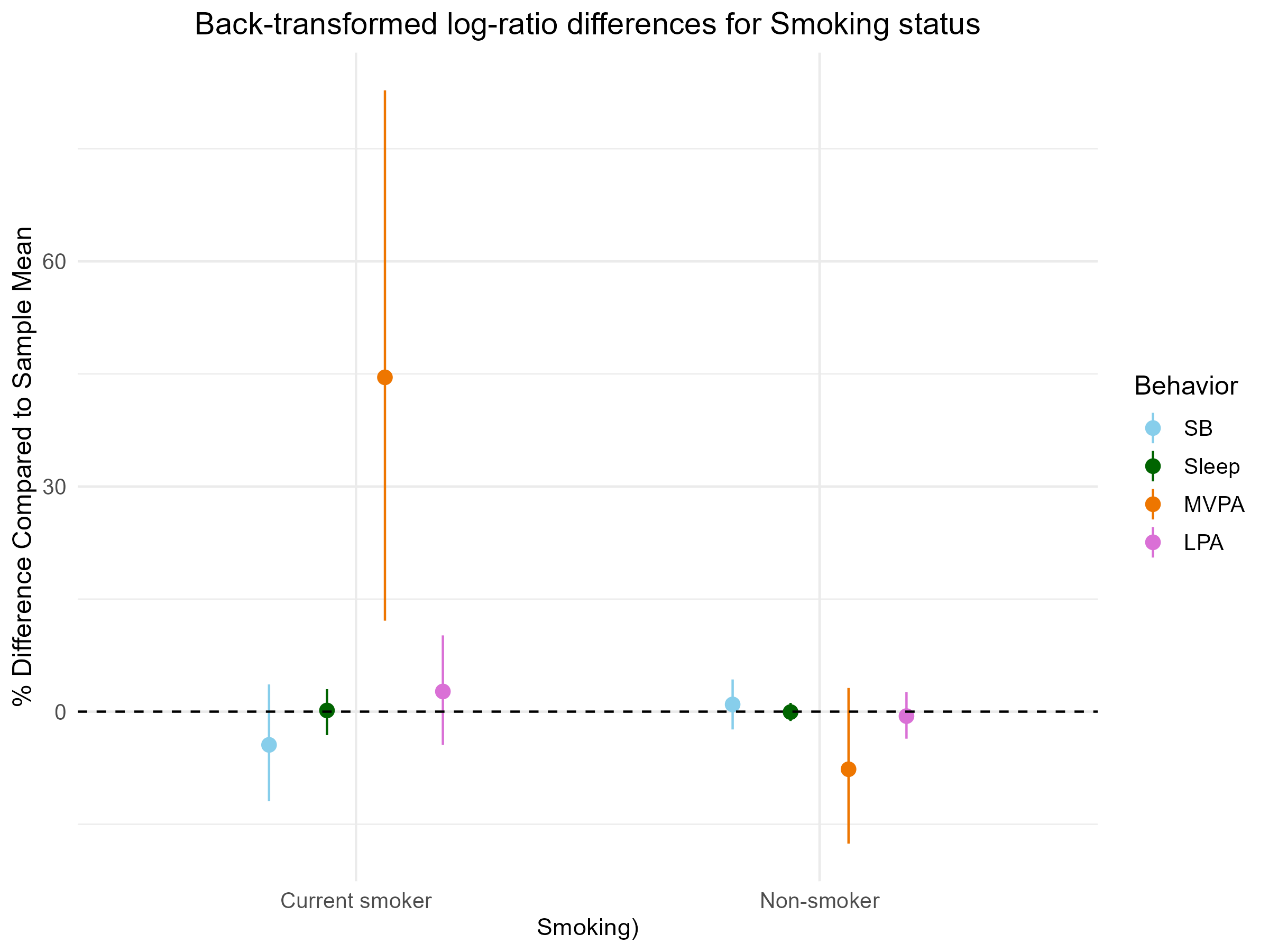


Supplemental Figure 3. The percentage differences with bootstrap 95 confidence intervals in 24-hour movement behaviour composition between smoking status and the sample mean. SB: sedentary behaviours, MVPA: moderate-vigorous physical activity, LPA: light physical activity.


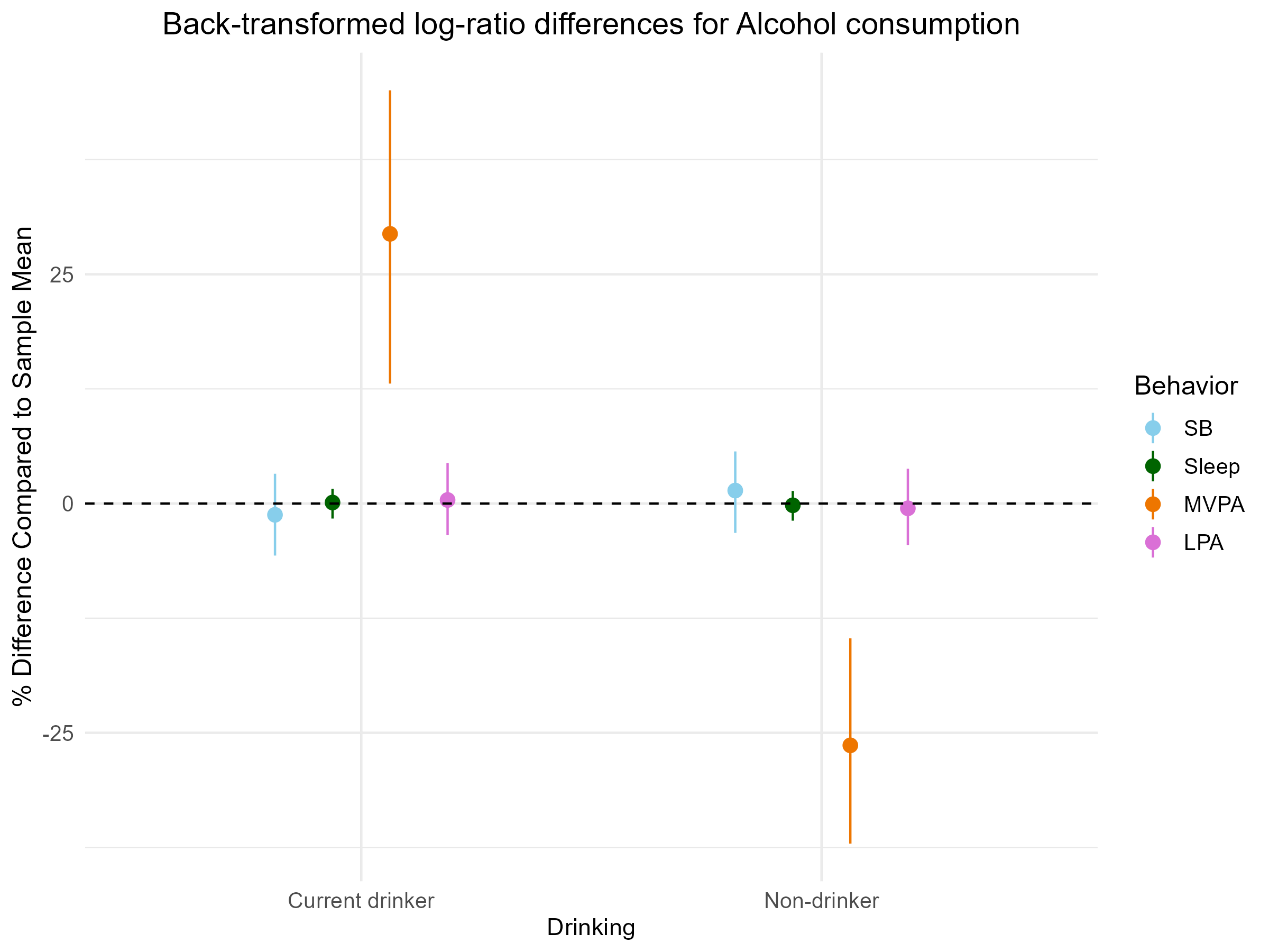


Supplemental Figure 4. The percentage differences with bootstrap 95 confidence intervals in 24-hour movement behaviour composition between alcohol consumption and the sample mean. SB: sedentary behaviours, MVPA: moderate-vigorous physical activity, LPA: light physical activity.
